# Supplementary material for: The LINKIN Health Census process: design and implementation
Source: PubMed Central journal article supplement (PMC3546420; doi:10.1186/1472-6963-12-321), 2012-09-18
Supplement: 1472-6963-12-321-S2.pdf [file 1472-6963-12-321-S2.pdf]

**From:** [Dawn Hunter](#)  
**To:** [Elizabeth Hoon](#)  
**Subject:** RE: Poster for online display  
**Date:** Tuesday, 18 October 2011 9:43:44 PM  
**Attachments:** [image001.png](#)  
[image002.png](#)

---

Dear Elizabeth

Thank you for sending in your poster. I have sent this to my colleague to put online. In terms of using the table, that would be fine-as long as you reference.

Kind regards

Dawn

Dawn Hunter  
Acting Managing Editor  
Royal Society for Public Health  
John Snow House  
59 Mansell Street  
London  
E1 8AN  
[www.rsph.org.uk](http://www.rsph.org.uk)

DD: +44 (0) 20 7265 7332  
Switchboard: +44 (0) 20 7265 7300  
Fax: +44 (0) 20 7265 7301

**RSPH has moved offices!**

Please note our new address and telephone numbers above.

---

**From:** Elizabeth Hoon [mailto:[elizabeth.hoon@adelaide.edu.au](mailto:elizabeth.hoon@adelaide.edu.au)]  
**Sent:** 18 October 2011 02:41  
**To:** Dawn Hunter  
**Subject:** Poster for online display

Dear Dawn

Here is the poster for online publication.

I would like to seek authorisation from RSPH to use one of the tables from this poster in another publication- the table is titled 'Census Resources'. I would of course cite RSPH conference proceedings as the original source.

I look forward to hearing from you

Regards

Elizabeth

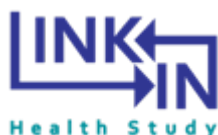

**Elizabeth Hoon**

*Research Fellow & Project Co-ordinator*

*Linkin Health Study*

*School of Population Health and Clinical Practice*

*The University of Adelaide*

*122 Frome Street*

*Adelaide 5005*

*ph: +61 (0)8 8313 1567*

*Email: [elizabeth.hoon@adelaide.edu.au](mailto:elizabeth.hoon@adelaide.edu.au)*

*website: [www.linkinhealth.org.au](http://www.linkinhealth.org.au)*

*facebook: [www.facebook.com/LinkinHealthStudy](http://www.facebook.com/LinkinHealthStudy)*

CRICOS Provider Number 00123M

-----  
This email message is intended only for the addressee(s) and contains information which may be confidential and/or copyright. If you are not the intended recipient please do not read, save, forward, disclose, or copy the contents of this email. If this email has been sent to you in error, please notify the sender by reply email and delete this email and any copies or links to this email completely and immediately from your system. No representation is made that this email is free of viruses. Virus scanning is recommended and is the responsibility of the recipient.
